# Supplementary material for: On the relative role of abiotic and biotic controls on channel network development: insights from scaled tidal flume experiments
Source: Copernicus journal article supplement (doi:10.5194/egusphere-2023-1515), 2023-07-25
Supplement: Supplementary file 2 [file egusphere-2023-1515-supplement.zip]

Archive with 7 entries (7 files):
- Sup_f01.png
- Sup_f02.png
- Sup_f03.png
- Sup_f04.png
- Sup_f05.png
- Sup_f06.png
- Captions_sup_figs.pdf
