# Supplementary figures and images for: On the relative role of abiotic and biotic controls on channel network development: insights from scaled tidal flume experiments
Source: Copernicus journal article supplement (doi:10.5194/egusphere-2023-1515), 2023-07-25

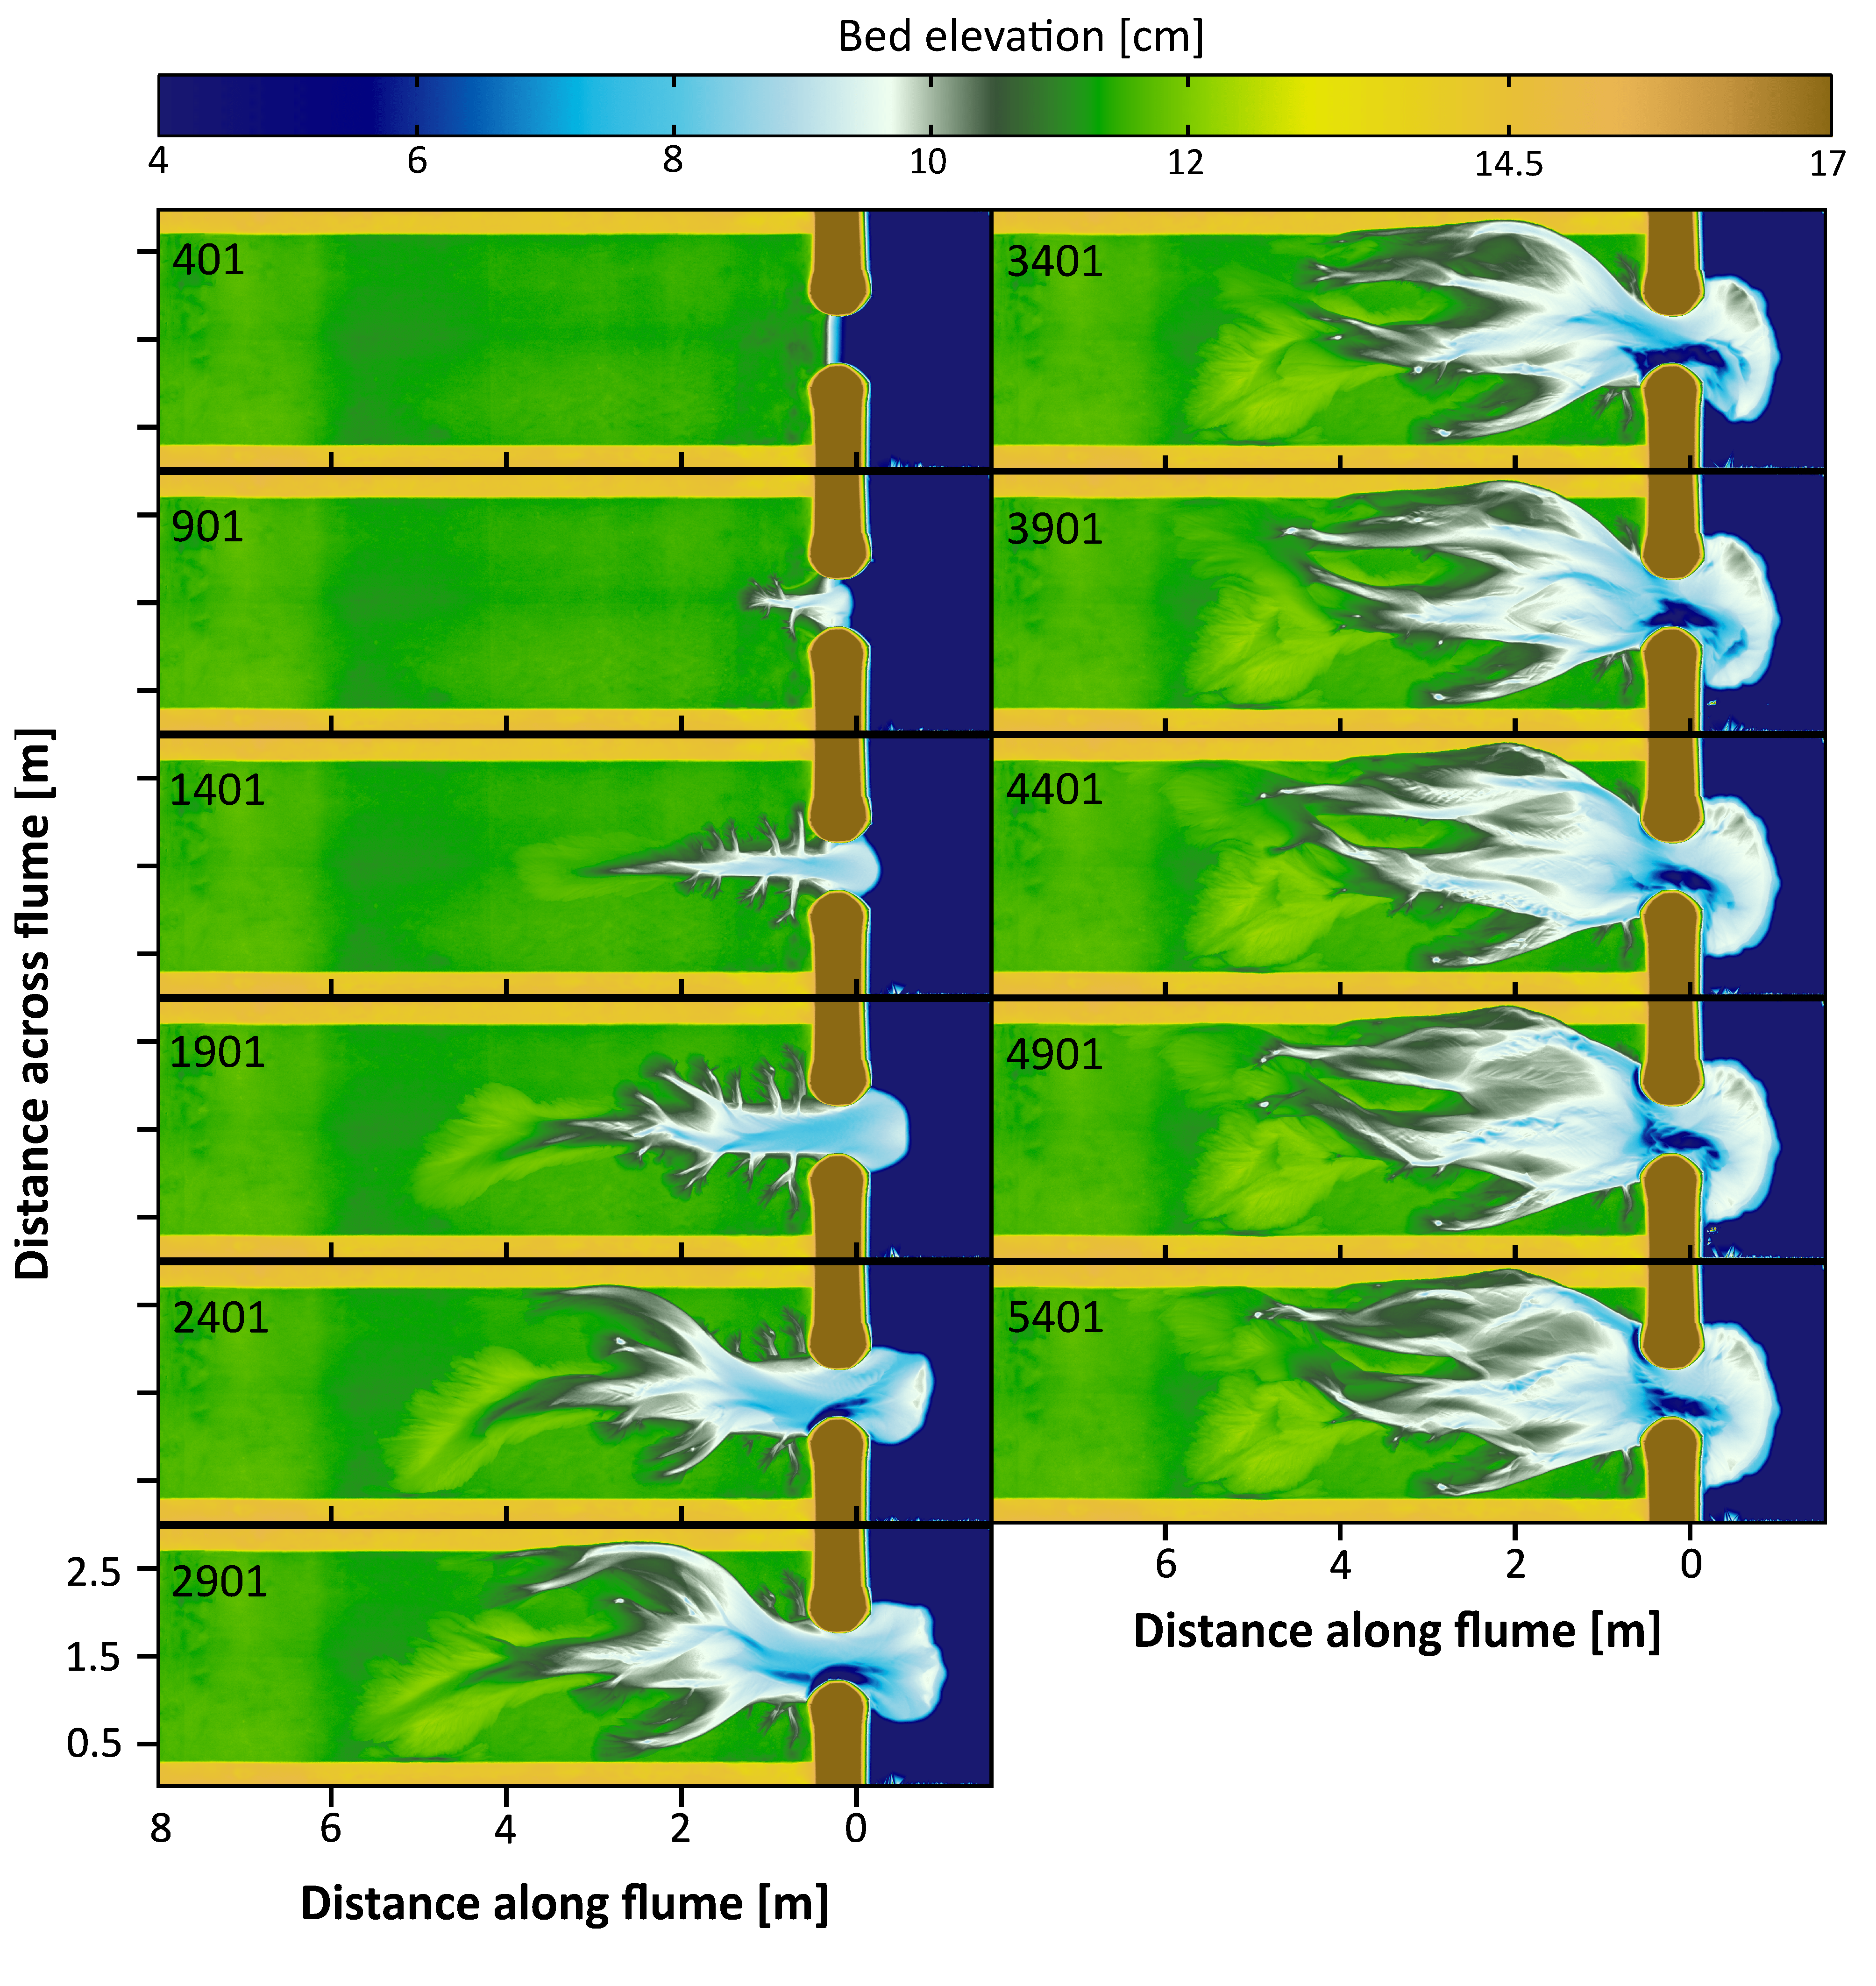

Supplement: Supplementary file 2 [file egusphere-2023-1515-supplement.zip › Sup_f01.png]

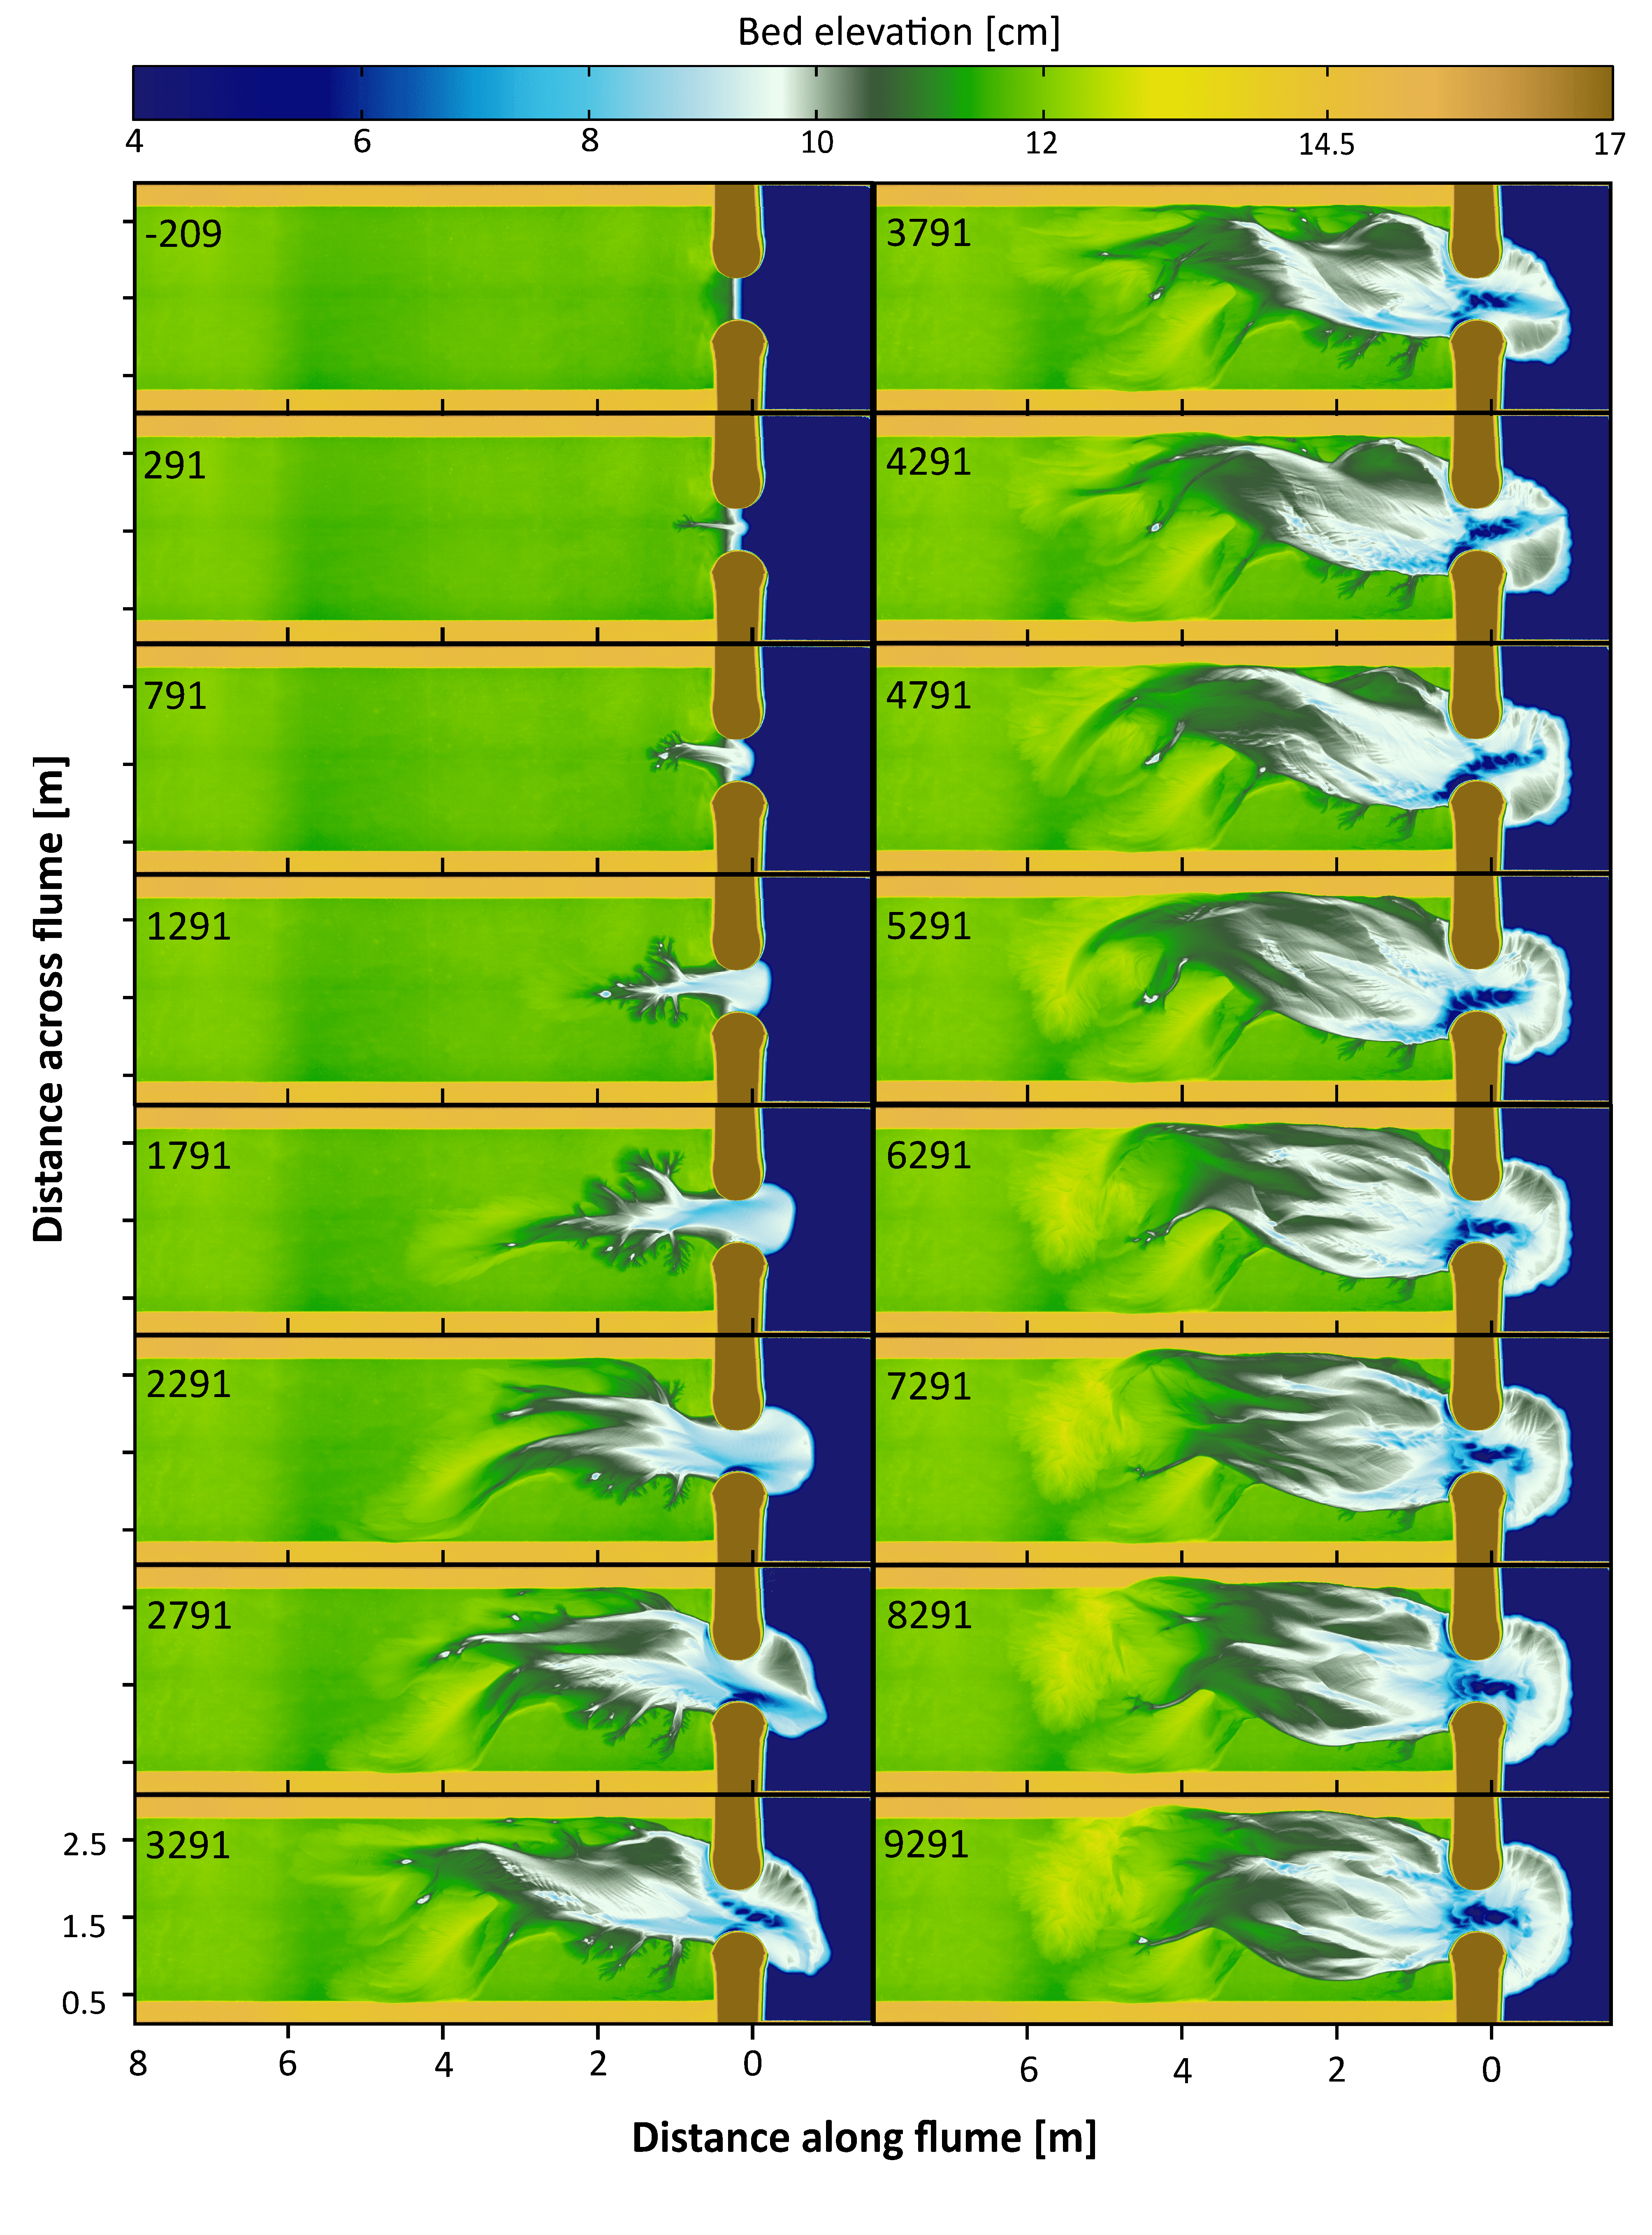

Supplement: Supplementary file 2 [file egusphere-2023-1515-supplement.zip › Sup_f02.png]

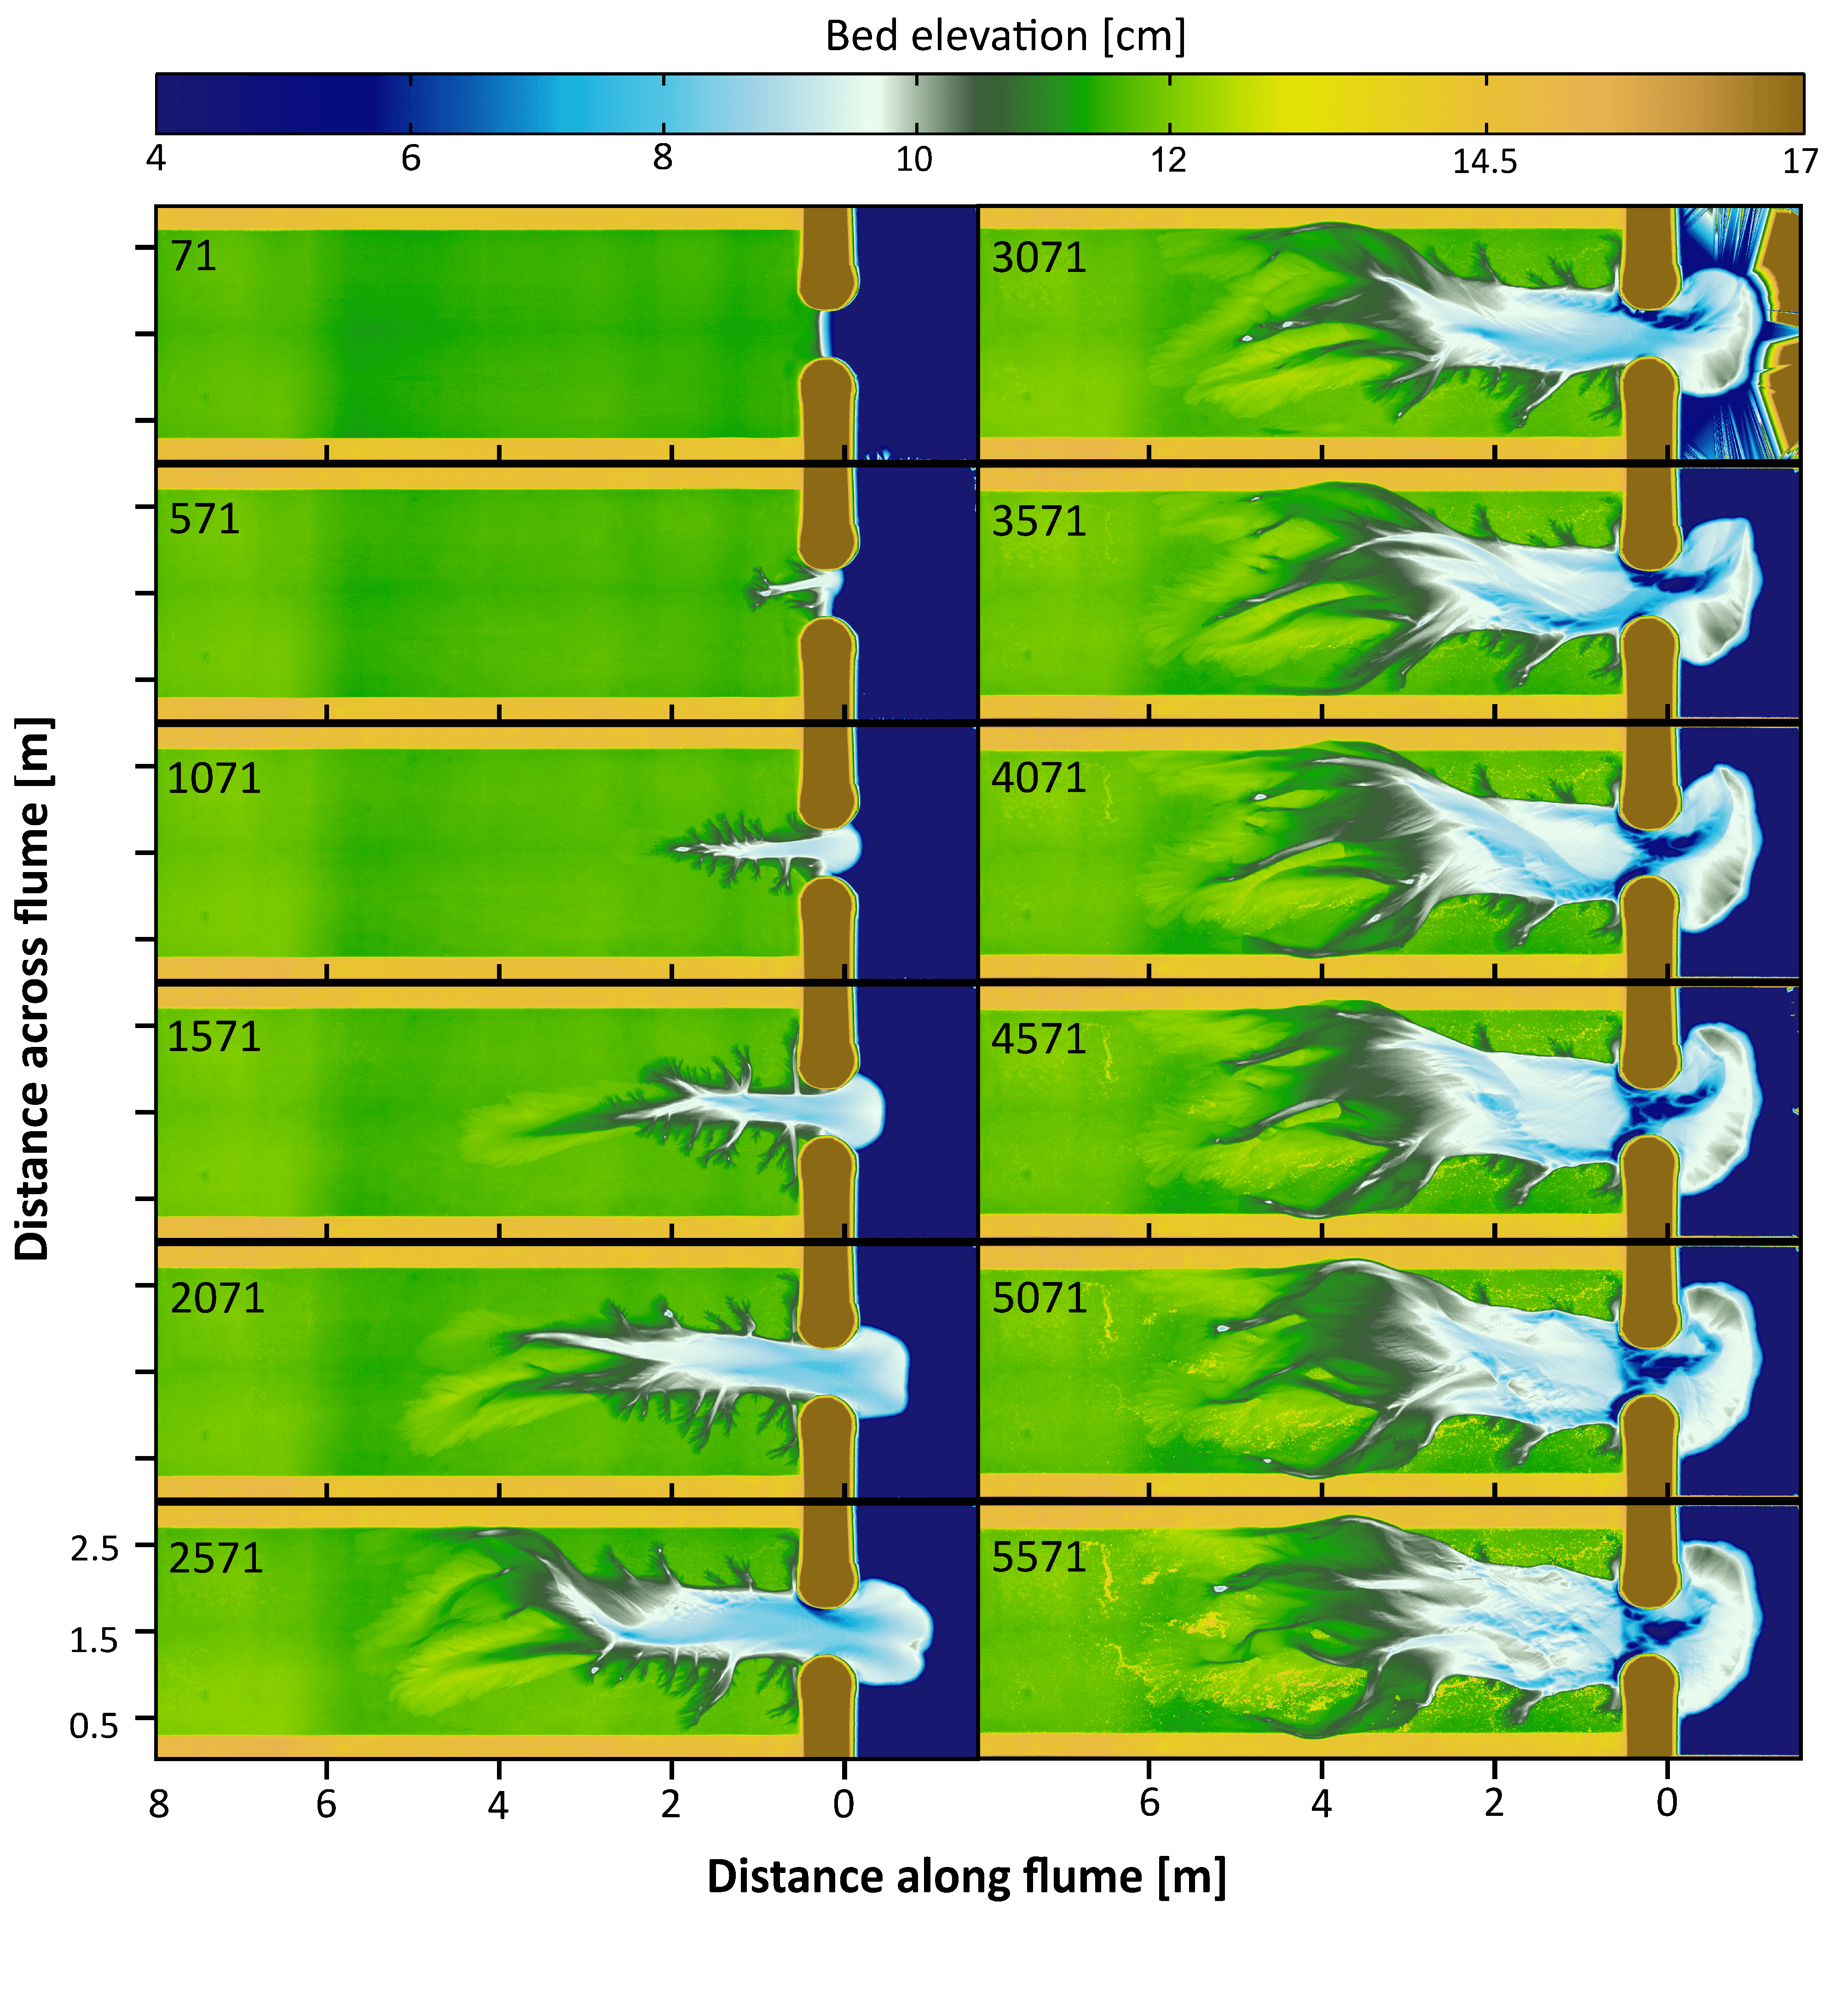

Supplement: Supplementary file 2 [file egusphere-2023-1515-supplement.zip › Sup_f03.png]

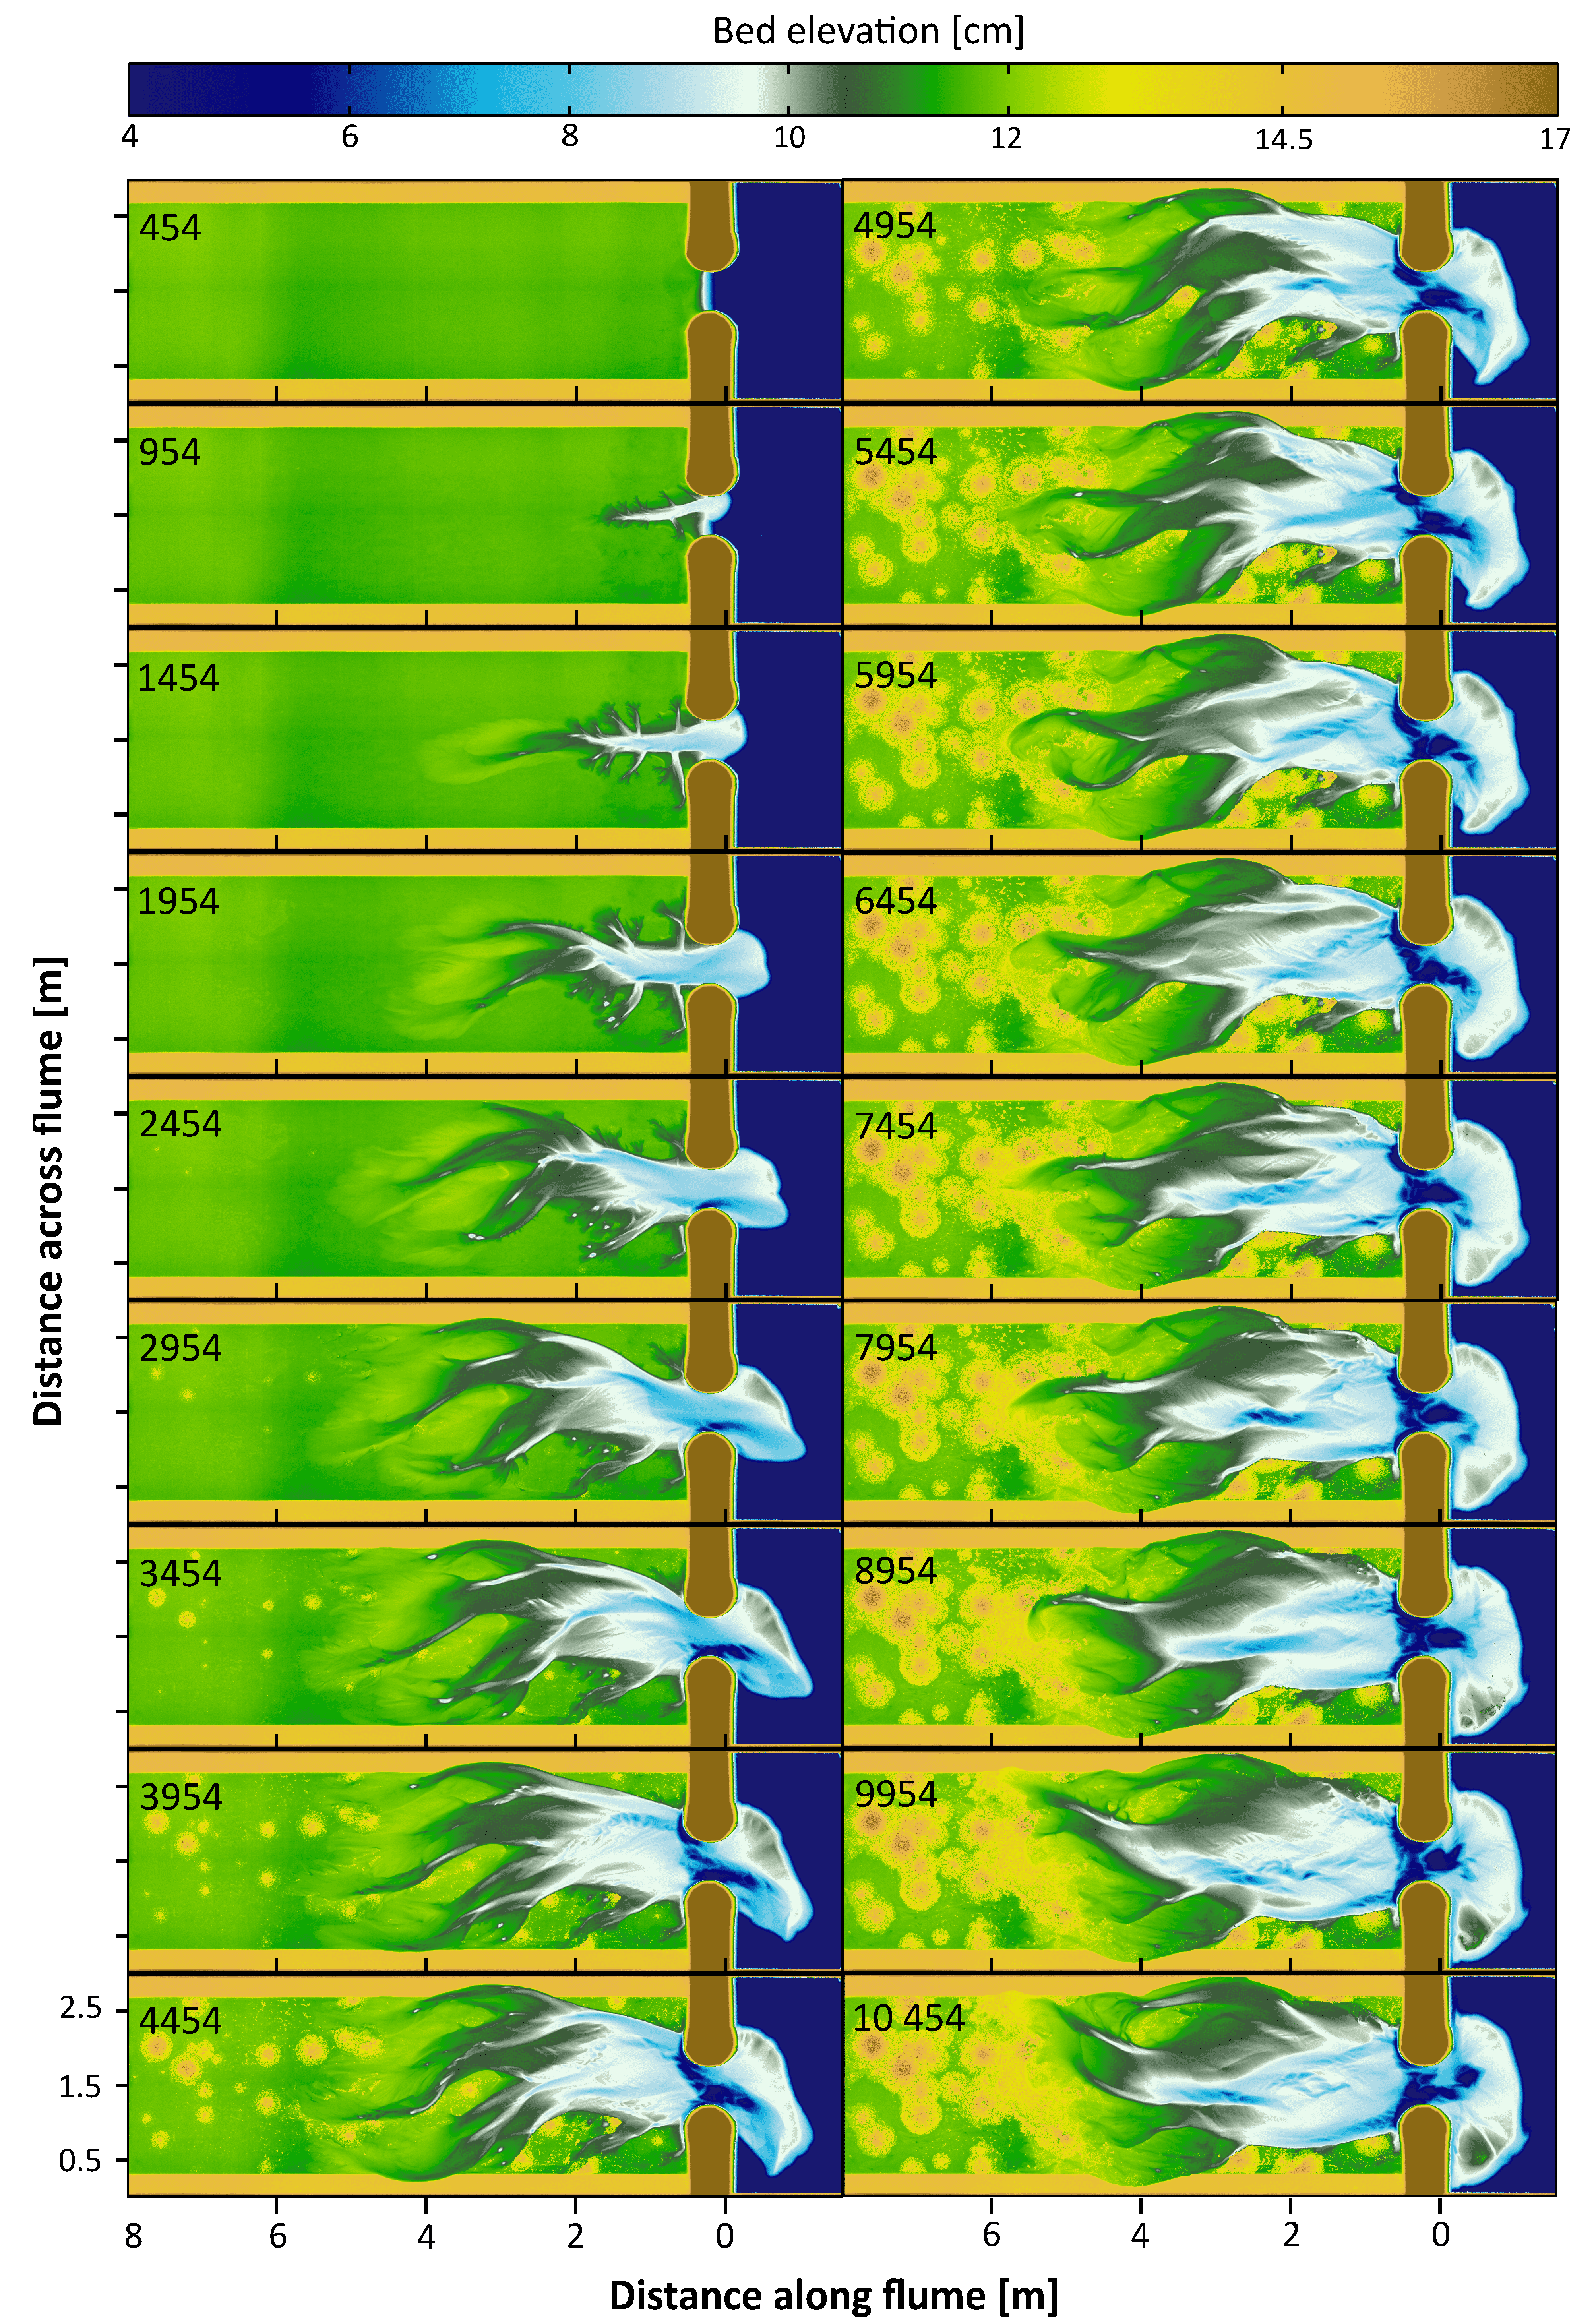

Supplement: Supplementary file 2 [file egusphere-2023-1515-supplement.zip › Sup_f04.png]

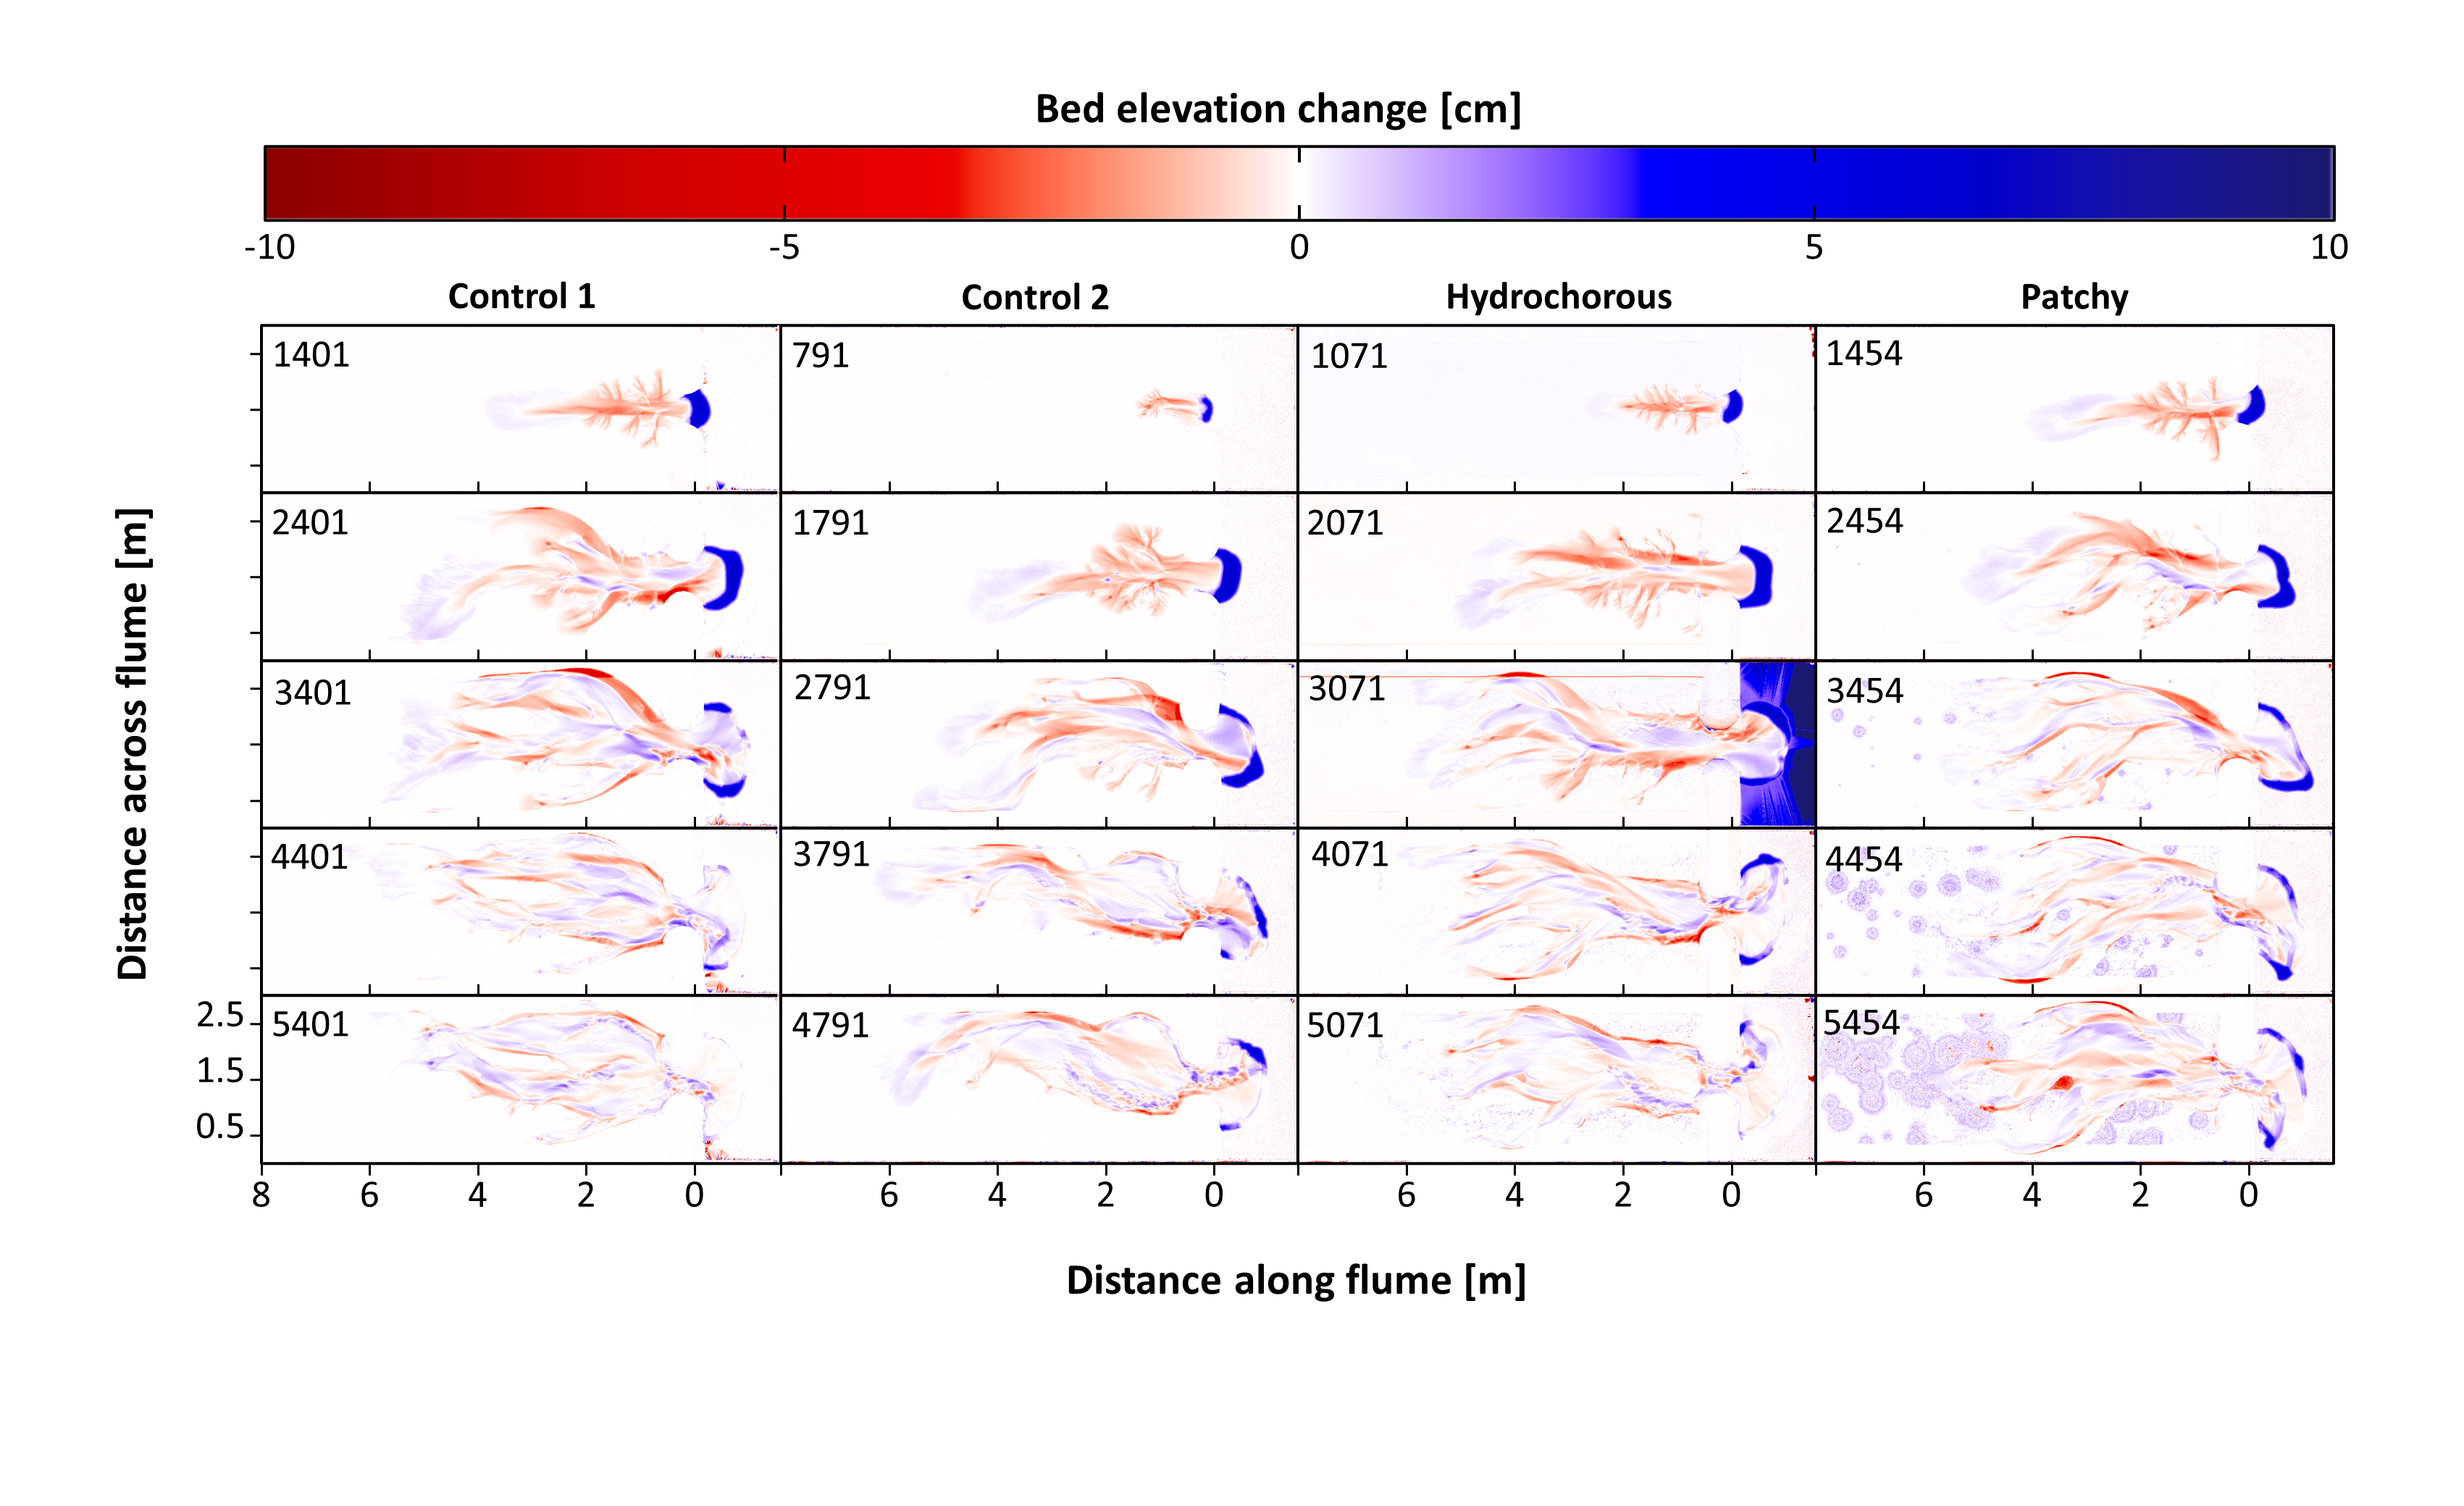

Supplement: Supplementary file 2 [file egusphere-2023-1515-supplement.zip › Sup_f05.png]

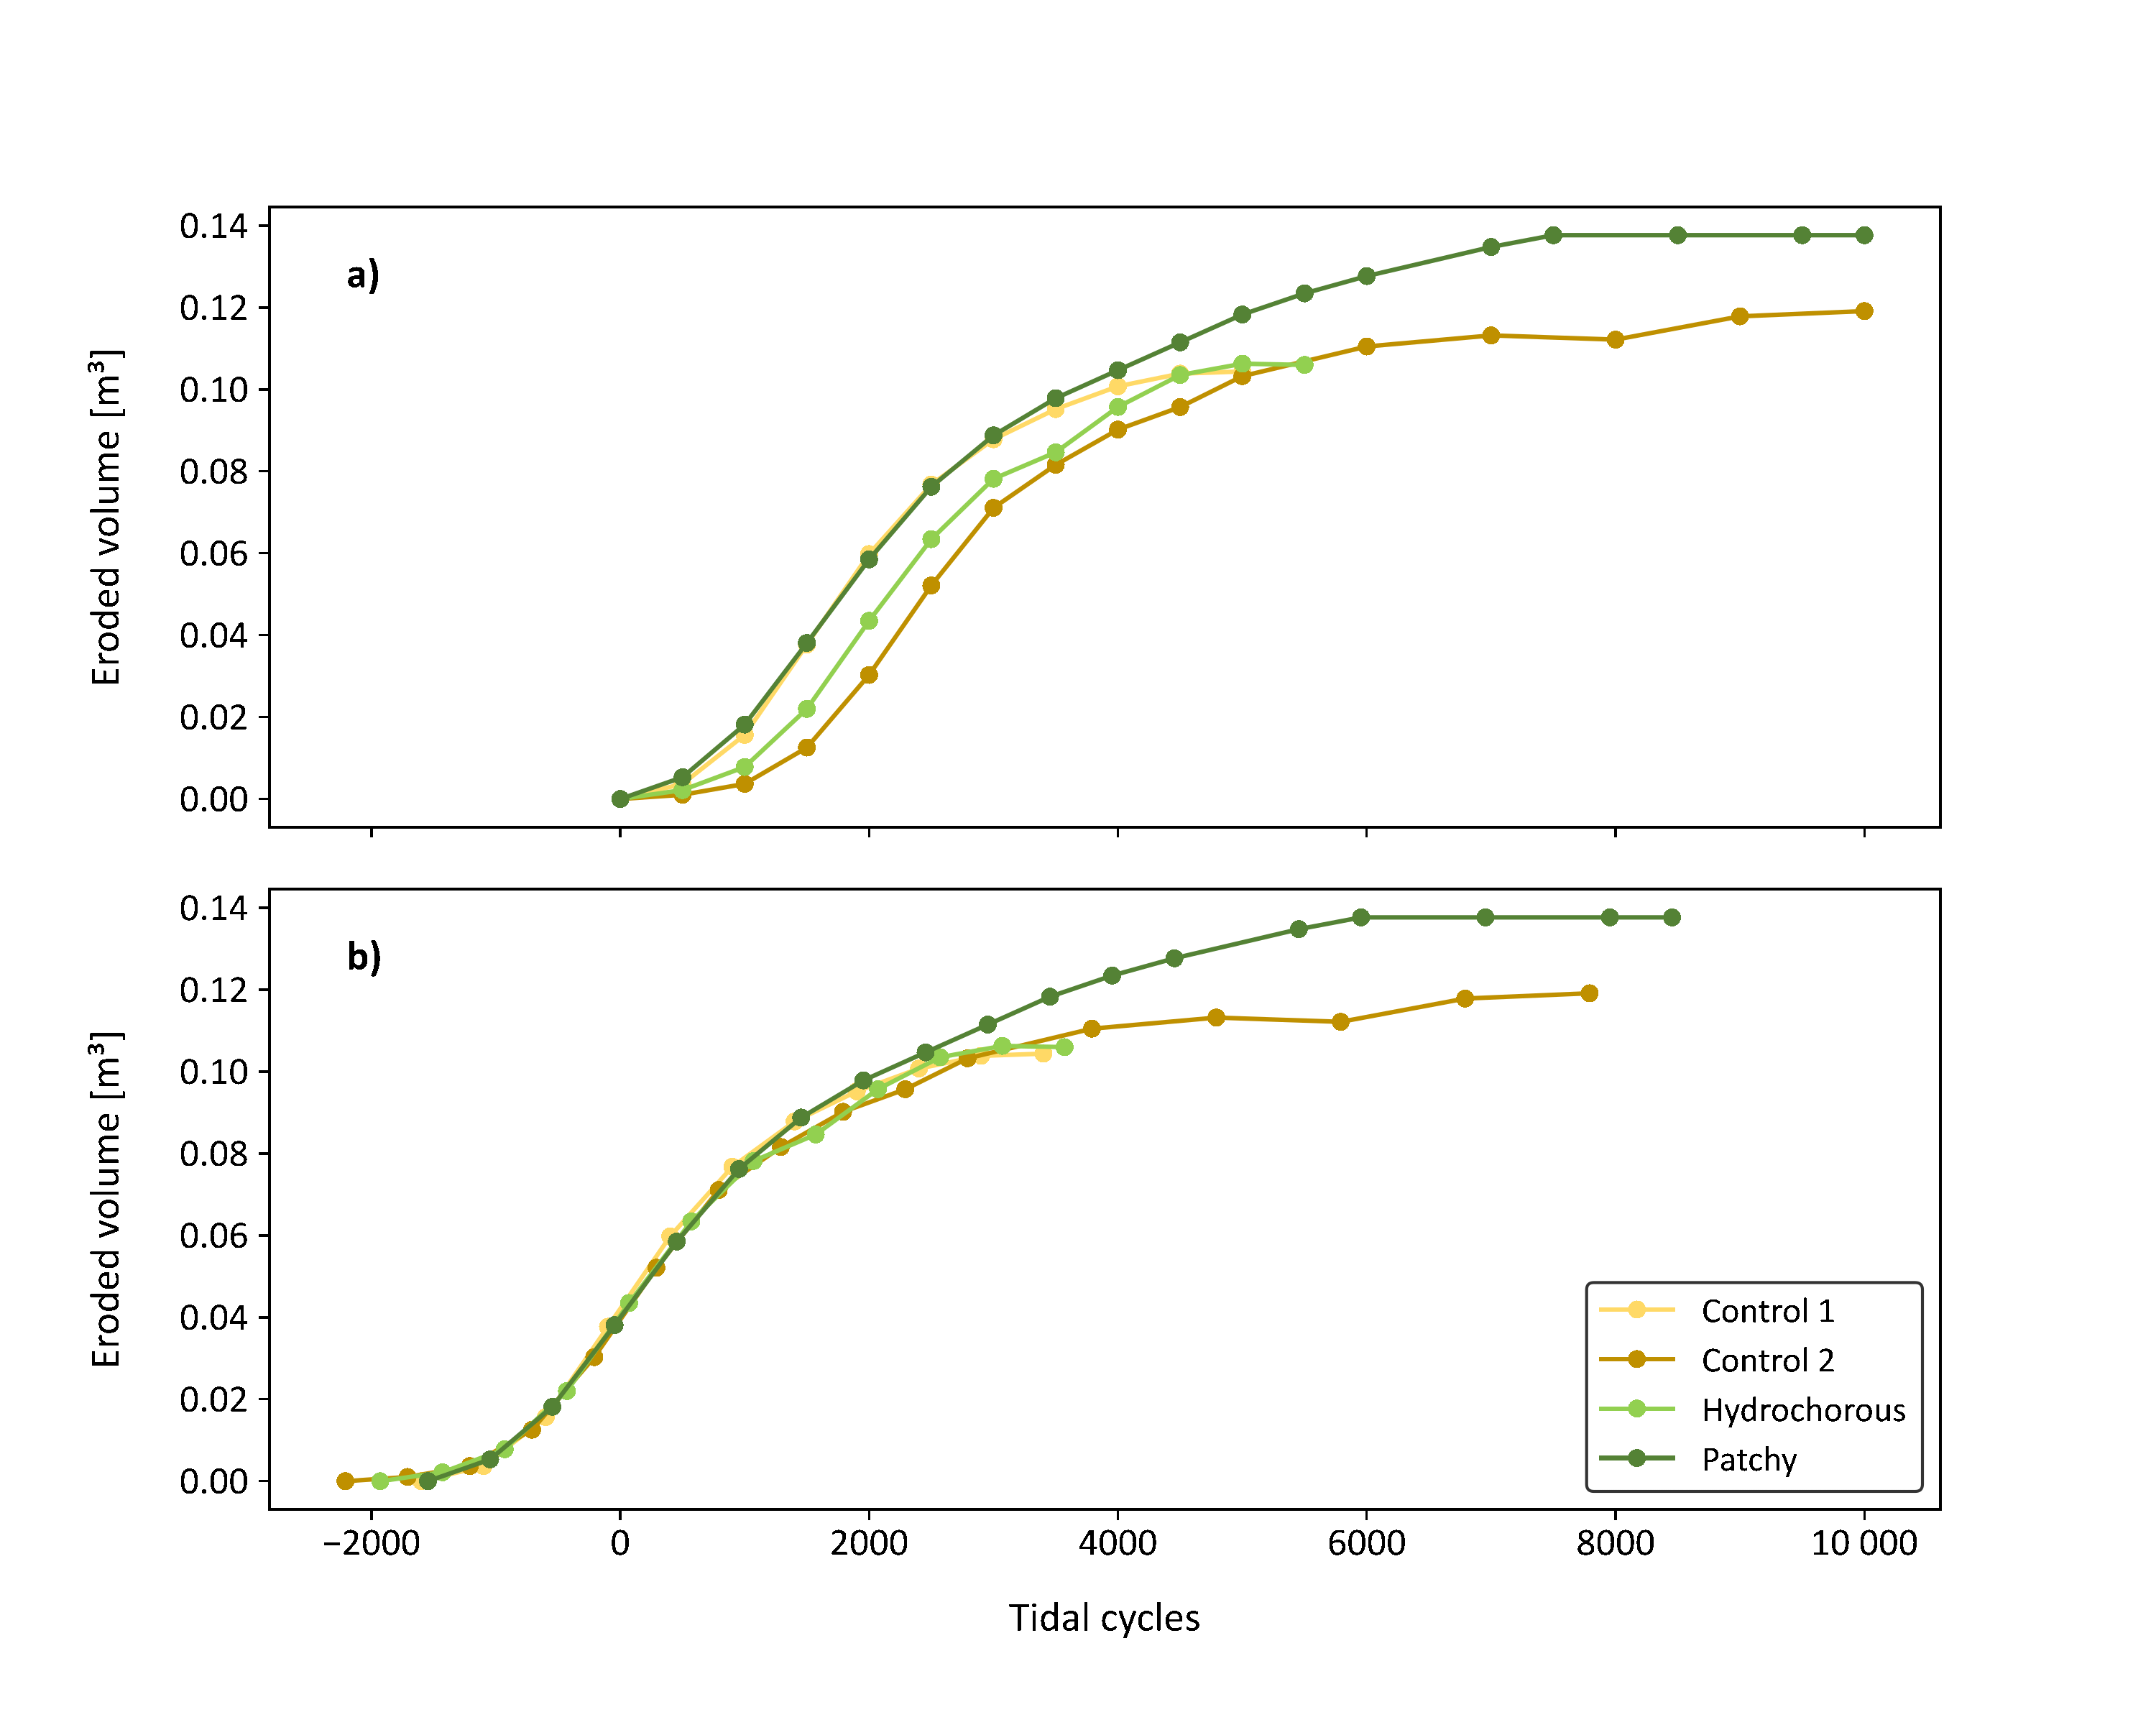

Supplement: Supplementary file 2 [file egusphere-2023-1515-supplement.zip › Sup_f06.png]
